# Supplementary material for: Electric field-assisted NSR process for lean NOx reduction at low temperatures
Source: Royal Society of Chemistry journal article supplement (doi:10.1039/d3cc05189g), 2024-01-01
Supplement: d3cc05189g1.pdf [file d3cc05189g1.pdf]

## ESI (Electronic Supplementary Information)

Title:

### Electric field-assisted NSR process for lean NO<sub>x</sub> reduction at low temperatures

Authors

Ayaka Shigemoto<sup>\*a</sup>, Yuki Inoda<sup>a</sup>, Chihiro Ukai<sup>a</sup>, Takuma Higo<sup>a</sup>, Kohei Oka<sup>b</sup>, Yasushi Sekine<sup>\*a</sup>

a Department of Applied Chemistry, Waseda University, 3-4-1, Okubo, Shinjuku, Tokyo, 169-8555, Japan, E-mail: ayaka.shigemoto@nifty.com, ysekine@waseda.jp

b Isuzu Central Research Center, Fujisawa, Kanagawa, Japan

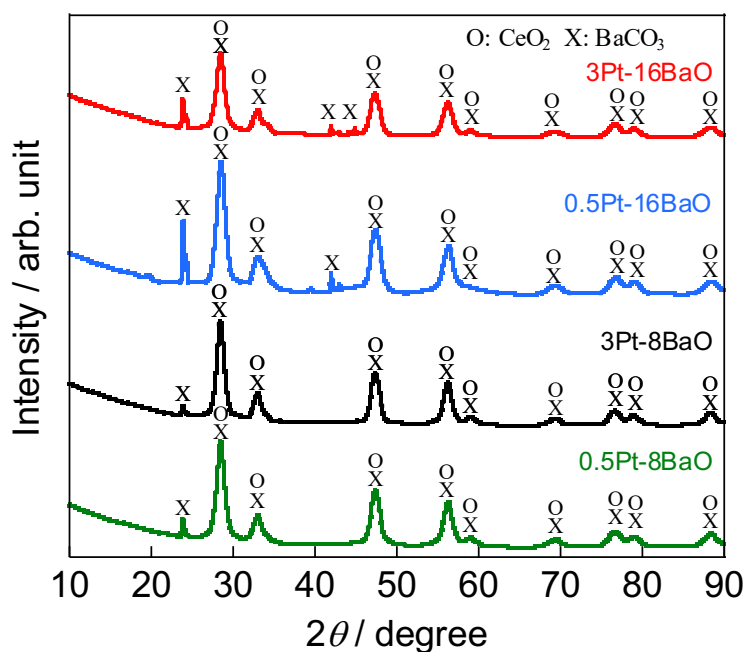

Figure S1. XRD spectra for  $x\text{wt}\%\text{Pt}-y\text{wt}\%\text{BaO}/\text{CeO}_2$  ( $x:y=3:16, 0.5:16, 3:8, 0.5:8$ ) after  $\text{H}_2$  pre-treatment.

(a) 3wt%Pt–16wt%BaO/CeO<sub>2</sub>

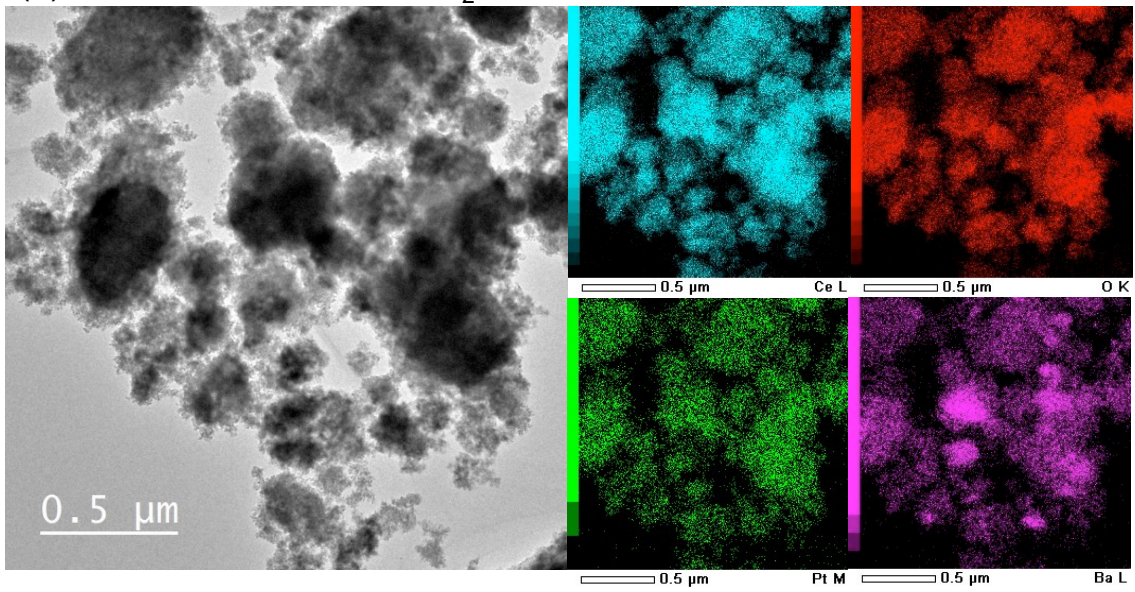

(b) 0.5wt%Pt–16wt%BaO/CeO<sub>2</sub>

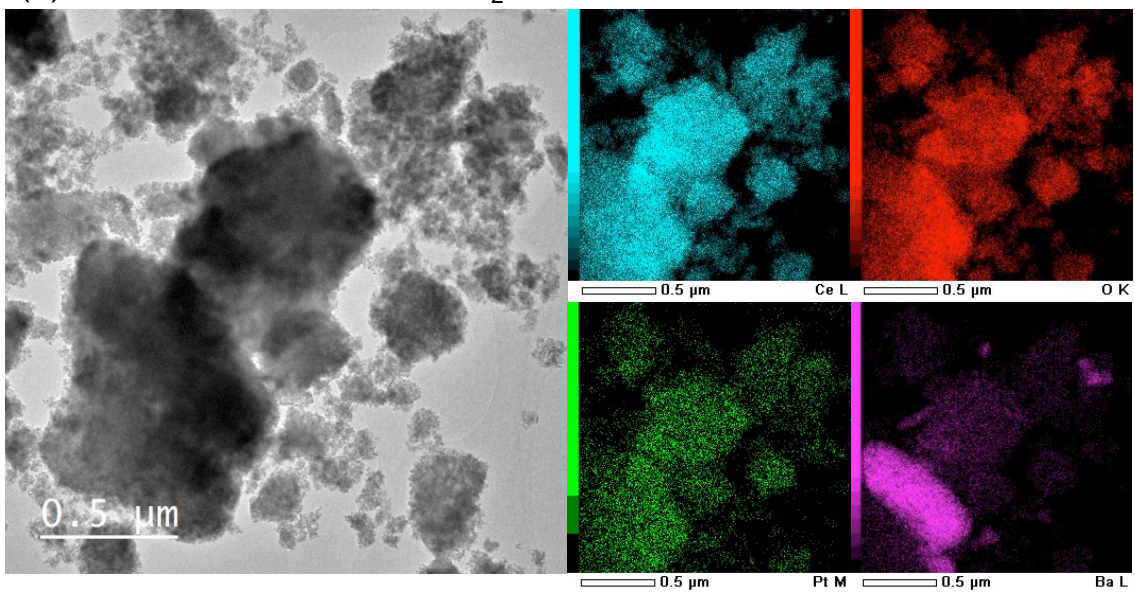

(c) 3wt%Pt–8wt%BaO/CeO<sub>2</sub>

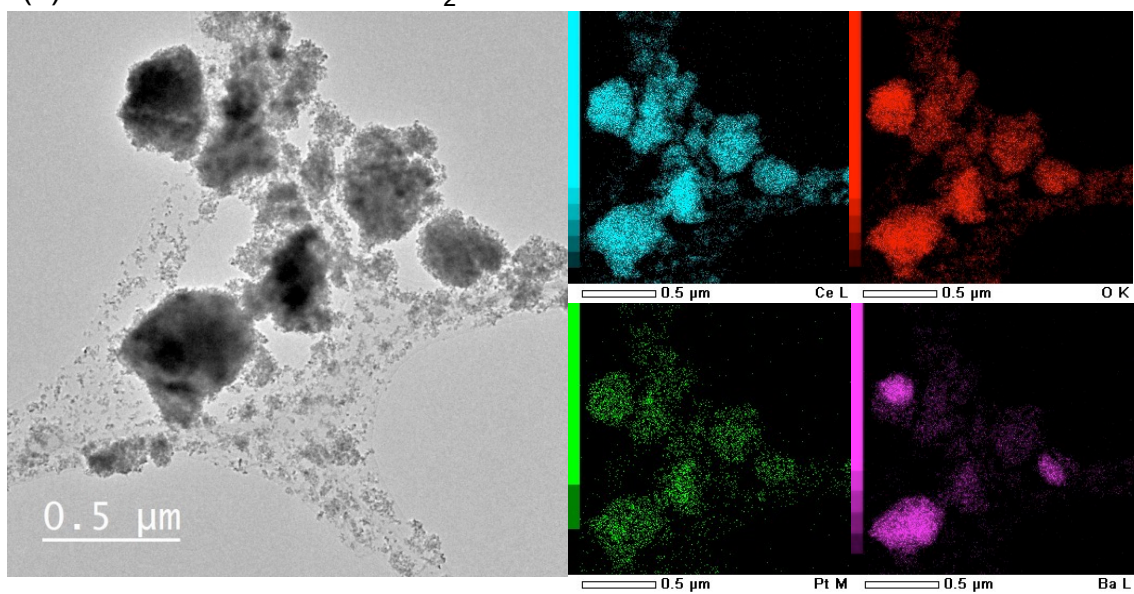

(d) 0.5wt%Pt–8wt%BaO/CeO<sub>2</sub>

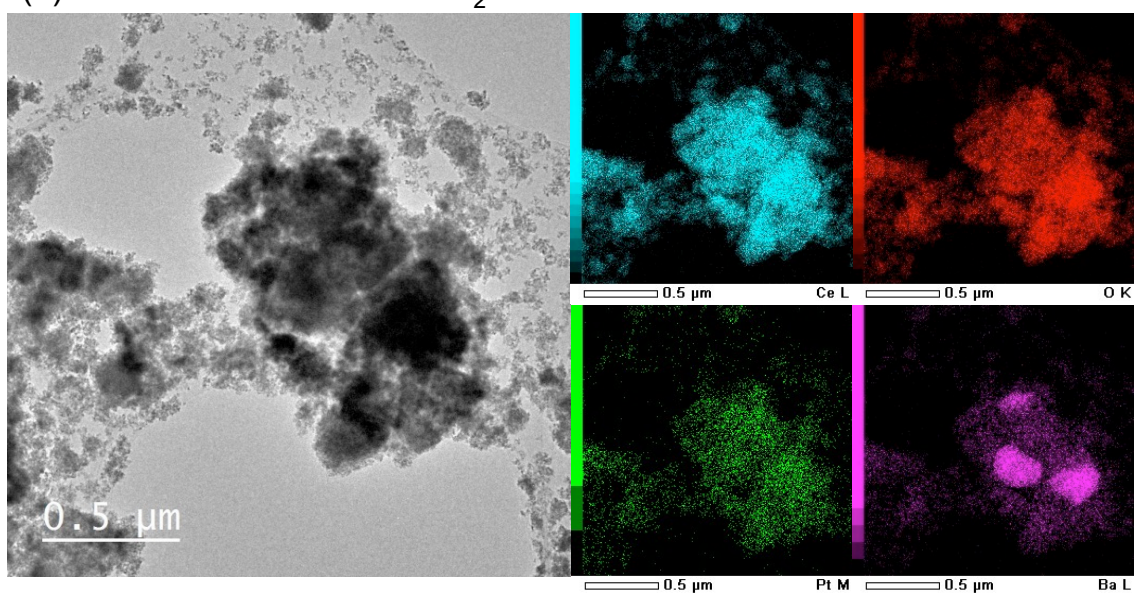

Figure S2. TEM and HAADF images and EDX mapping of (a) 3wt%Pt–16wt%BaO/CeO<sub>2</sub>, (b) 0.5wt%Pt–16wt%BaO/CeO<sub>2</sub>, (c) 3wt%Pt–8wt%BaO/CeO<sub>2</sub> and (d) 0.5wt%Pt–8wt%BaO/CeO<sub>2</sub>.



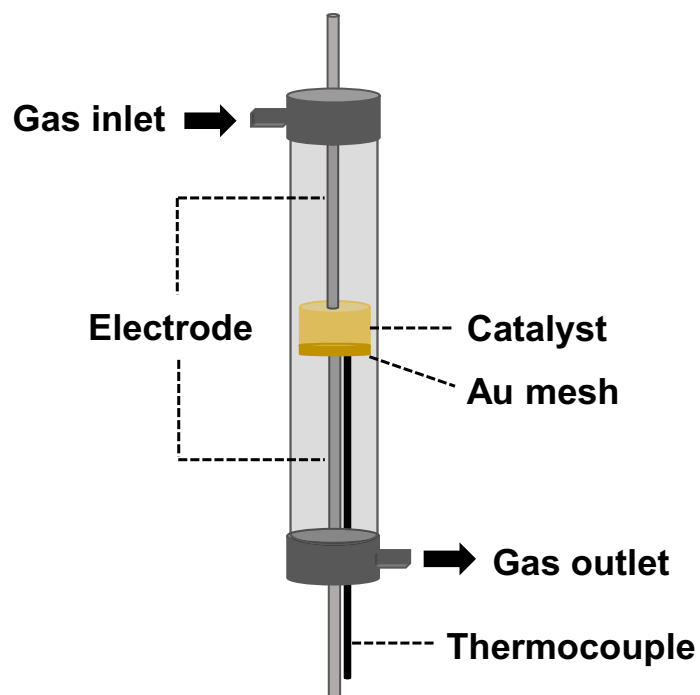

Figure S3. A schematic image of the activity test reactor.

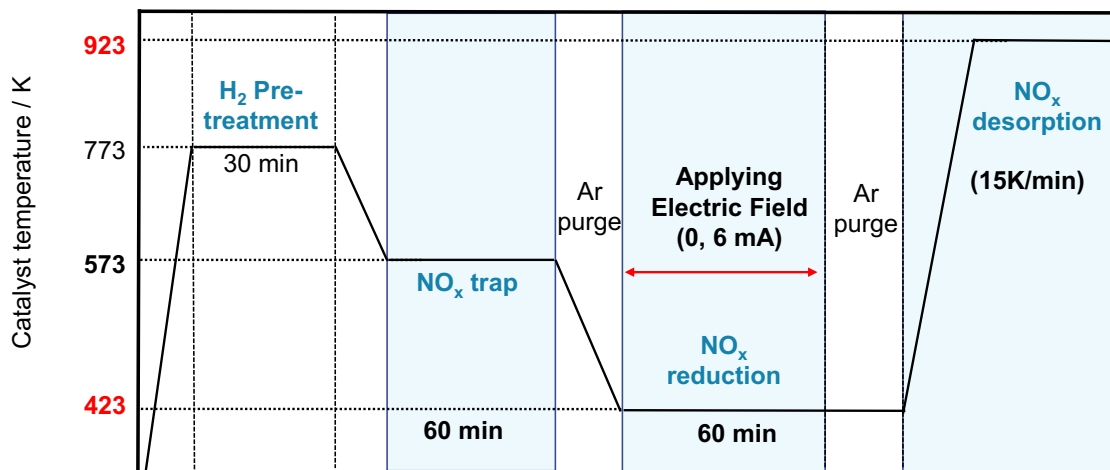

■ **Gas composition**

- Pre-treatment : 5 vol% H<sub>2</sub> (100mL/min)
- NO<sub>x</sub> trap : 700 ppm NO, 8 vol% O<sub>2</sub> (total 200mL/min)
- NO<sub>x</sub> reduction : 0.2 vol% H<sub>2</sub>, 8 vol% O<sub>2</sub>, 10 vol% H<sub>2</sub>O (total 200mL/min)
- NO<sub>x</sub> desorption : Ar (total 200mL/min)

Figure S4. Protocol for activity tests.

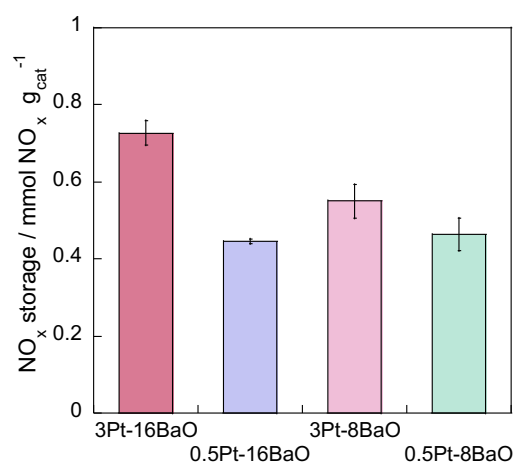

Figure S5. NO<sub>x</sub> storage capacity for xwt%Pt–ywt%BaO/CeO<sub>2</sub> (x: y= 3: 16, 0.5: 16, 3: 8, 0.5: 8).

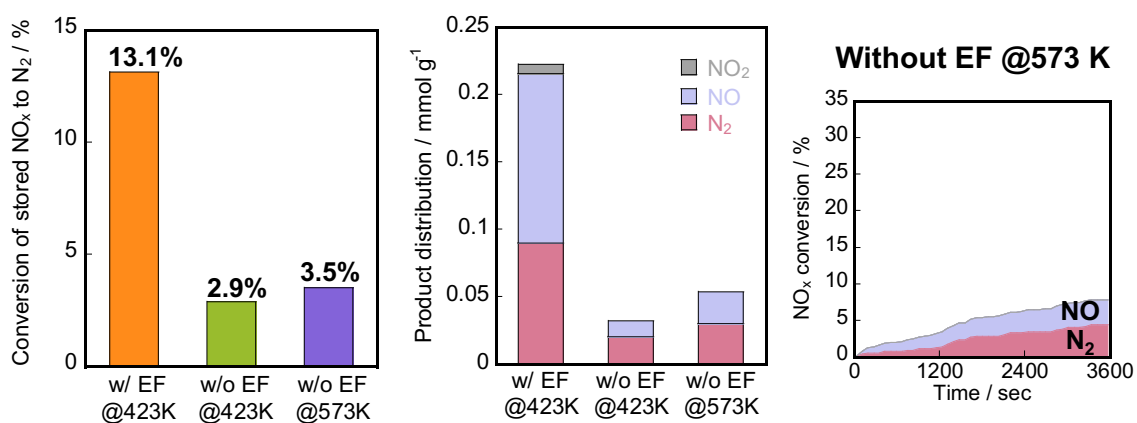

Figure S6. Lean NO<sub>x</sub> reduction (0.2 vol% H<sub>2</sub>, 8 vol% O<sub>2</sub>, 10 vol% H<sub>2</sub>O) over 3wt%Pt–16wt%BaO/CeO<sub>2</sub> without the electric field at 573 K.

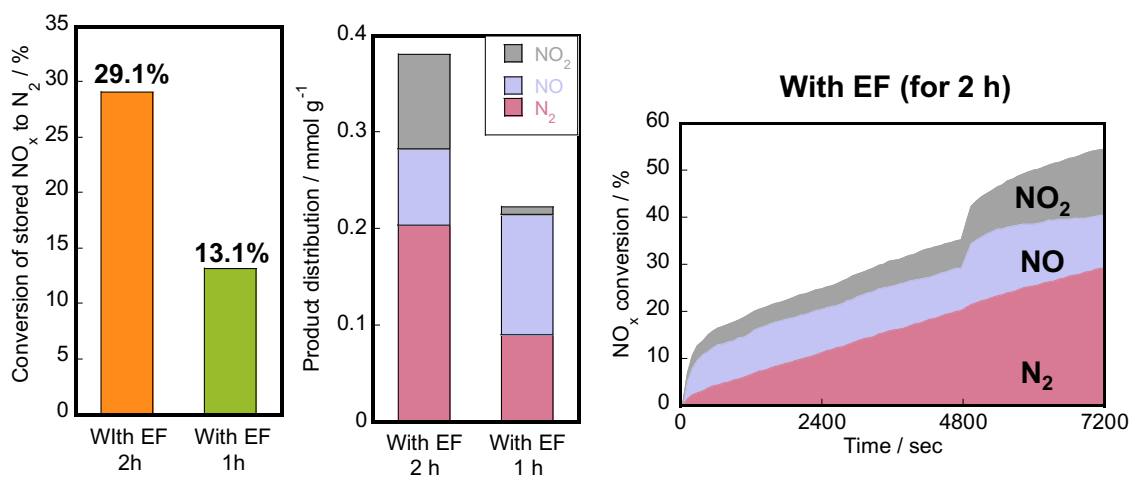

Figure S7. Lean NO<sub>x</sub> reduction (0.2 vol% H<sub>2</sub>, 8 vol% O<sub>2</sub>, 10 vol% H<sub>2</sub>O) for 2 hours over 3wt%Pt–16wt%BaO/CeO<sub>2</sub> with the electric field at 423 K.

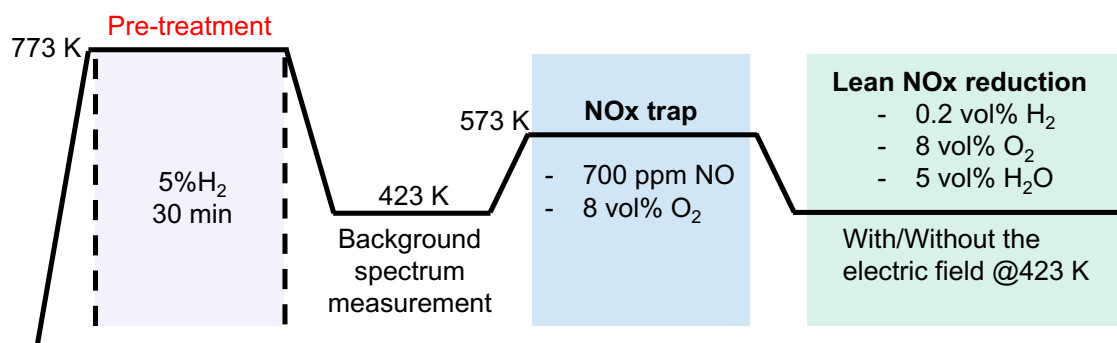

Figure S8. Protocol for *in-situ* TIRS measurement without and with the electric field (6-mA) at 423 K.

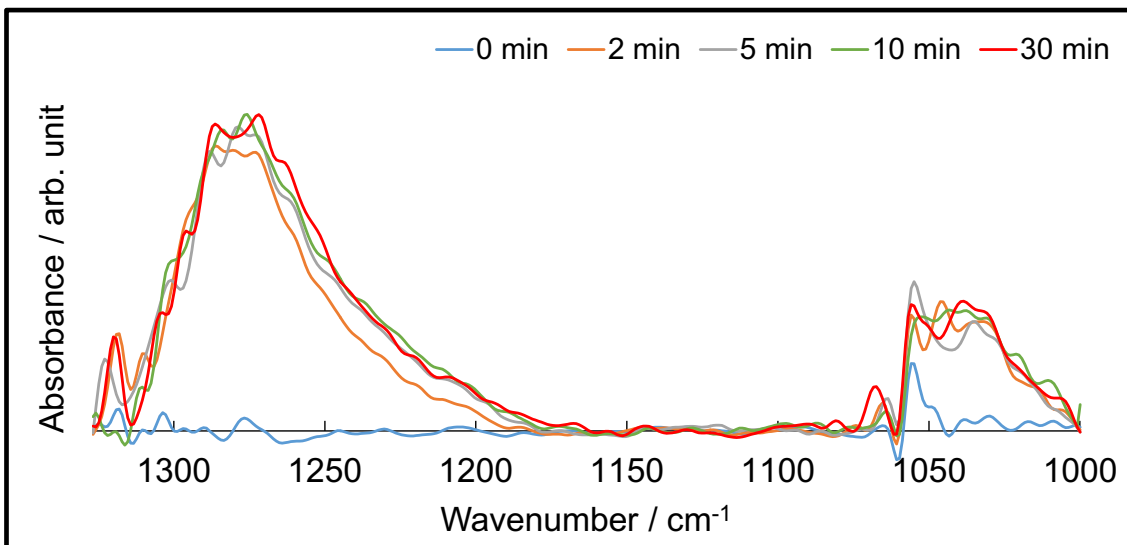

Figure S9. Transmission infrared spectroscopy spectra during NO<sub>x</sub> storage over 3wt%Pt-16wt%BaO/CeO<sub>2</sub>.

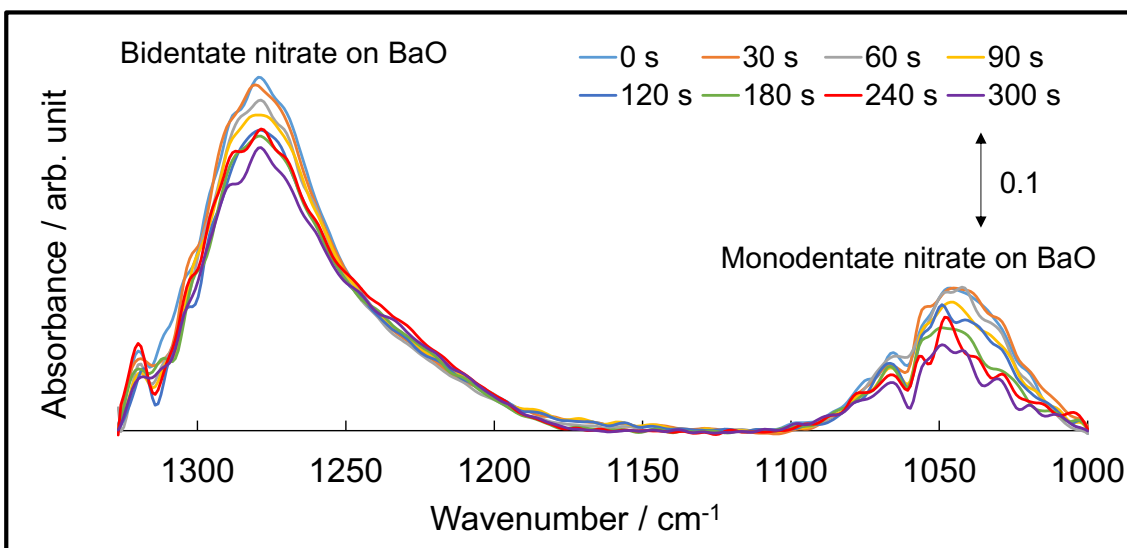

Figure S10. Transmission infrared spectroscopy spectra during lean NO<sub>x</sub> reduction over 3wt%Pt-16wt%BaO/CeO<sub>2</sub> without the electric field.

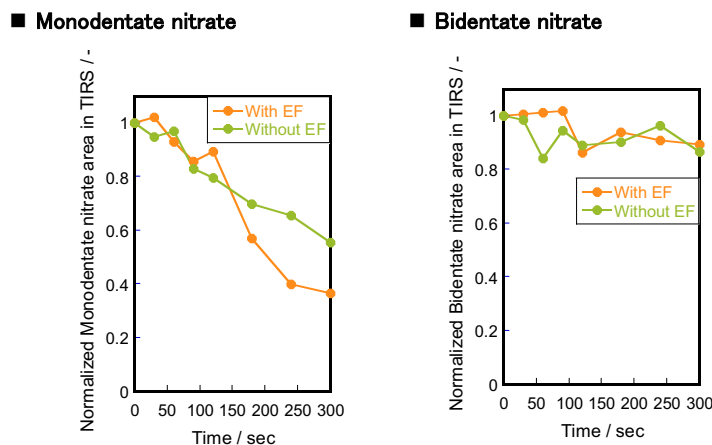

Figure S11. Normalized area of monodentate and bidentate nitrates in TIRS (Normalized based on 0 sec).

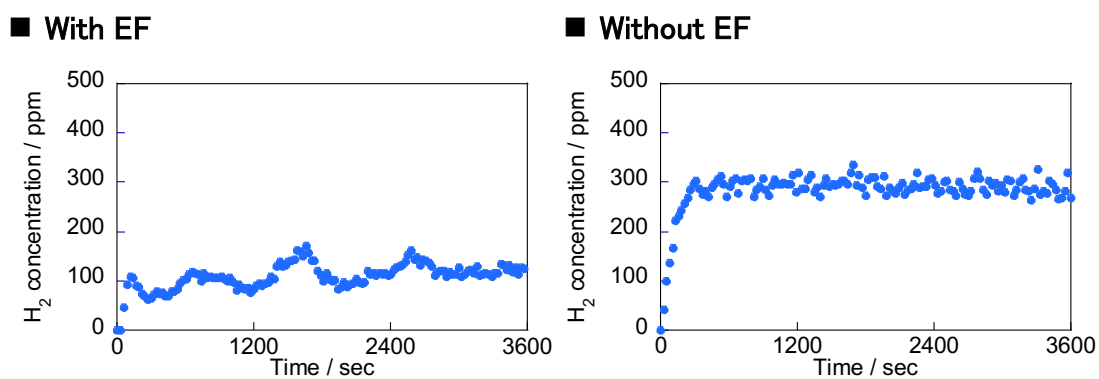

Figure S12. Outlet H<sub>2</sub> concentration during NO<sub>x</sub> reduction over 3wt%Pt-16wt%BaO/CeO<sub>2</sub>.

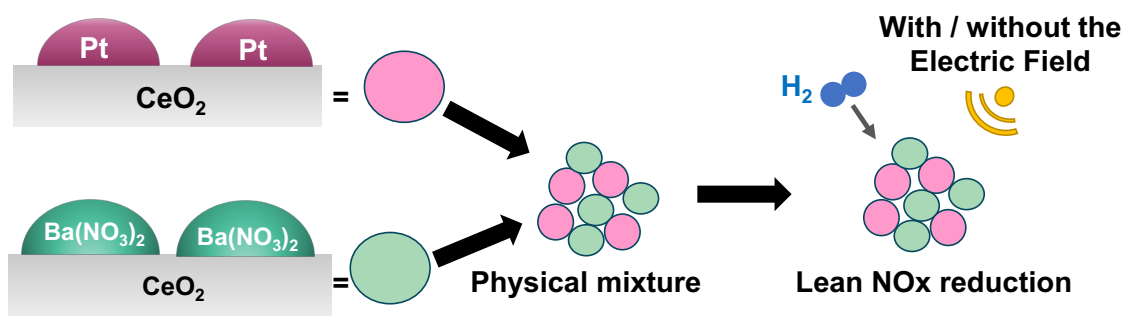

Figure S13. A schematic image of a physical mixture of 3wt%Pt/CeO<sub>2</sub> and 16wt%Ba(NO<sub>3</sub>)<sub>2</sub>/CeO<sub>2</sub> catalyst.



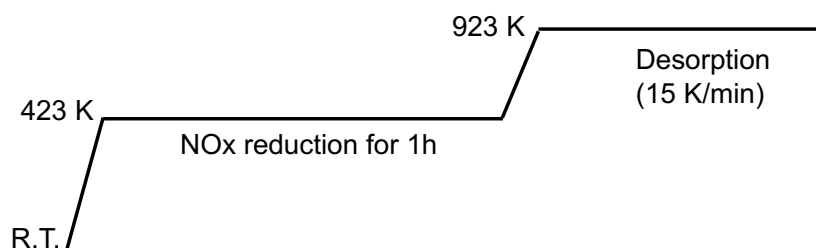

Figure S14. Protocol for activity tests with a physical mixture of 3wt%Pt/CeO<sub>2</sub> and 16wt%Ba(NO<sub>3</sub>)<sub>2</sub>/CeO<sub>2</sub> catalyst.

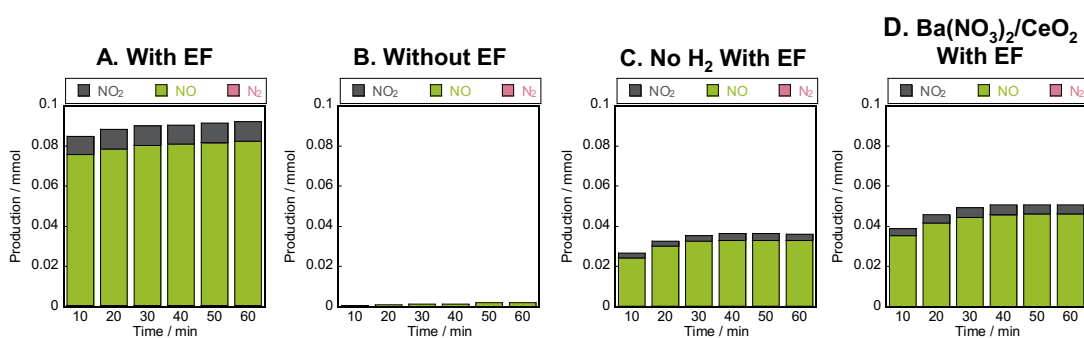

Figure S15. The distribution of nitrogen-containing species in the outlet gas (calculated on nitrogen-base) during (A) lean NO<sub>x</sub> reduction (0.2 vol% H<sub>2</sub>, 8 vol% O<sub>2</sub>, 10 vol% H<sub>2</sub>O) over a physical mixture of 3wt%Pt/CeO<sub>2</sub> and 16wt%Ba(NO<sub>3</sub>)<sub>2</sub>/CeO<sub>2</sub> with the electric field at 423 K, (B) lean NO<sub>x</sub> reduction over a physical mixture of 3wt%Pt/CeO<sub>2</sub> and 16wt%Ba(NO<sub>3</sub>)<sub>2</sub>/CeO<sub>2</sub> without the electric field at 423 K, (C) lean NO<sub>x</sub> reduction without H<sub>2</sub> (8 vol% O<sub>2</sub>, 10 vol% H<sub>2</sub>O) over a physical mixture of 3wt%Pt/CeO<sub>2</sub> and 16wt%Ba(NO<sub>3</sub>)<sub>2</sub>/CeO<sub>2</sub> with the electric field at 423 K, and (D) lean NO<sub>x</sub> reduction (0.2 vol% H<sub>2</sub>, 8 vol% O<sub>2</sub>, 10 vol% H<sub>2</sub>O) over 16wt%Ba(NO<sub>3</sub>)<sub>2</sub>/CeO<sub>2</sub> with the electric field at 423 K.

In order to verify the promotion of hydrogen spillover/migration by the electric field, we performed the following four reduction tests.

1. Lean NO<sub>x</sub> reduction over a physical mixture of 3wt%Pt/CeO<sub>2</sub> and 16wt%Ba(NO<sub>3</sub>)<sub>2</sub>/CeO<sub>2</sub> catalyst with the electric field
2. Lean NO<sub>x</sub> reduction over a physical mixture of 3wt%Pt/CeO<sub>2</sub> and 16wt%Ba(NO<sub>3</sub>)<sub>2</sub>/CeO<sub>2</sub> catalyst without the electric field

3. Lean NO<sub>x</sub> reduction without supplying H<sub>2</sub> over a physical mixture of 3wt%Pt/CeO<sub>2</sub> and 16wt%Ba(NO<sub>3</sub>)<sub>2</sub>/CeO<sub>2</sub> catalyst with the electric field
4. Lean NO<sub>x</sub> reduction over 16wt%Ba(NO<sub>3</sub>)<sub>2</sub>/CeO<sub>2</sub> catalyst with the electric field

First, we prepared 3wt%Pt/CeO<sub>2</sub> and 16wt%Ba(NO<sub>3</sub>)<sub>2</sub>/CeO<sub>2</sub>. With CeO<sub>2</sub> (JRC-CEO-1) selected as the catalyst support, Pt(C<sub>5</sub>H<sub>7</sub>O<sub>2</sub>)<sub>2</sub> or Ba(NO<sub>3</sub>)<sub>2</sub> was used as a precursor, where 3 wt% of Pt or 16 wt% Ba was loaded onto the support using the impregnation method. They were dried at 393 K for 20 h, and only Pt/CeO<sub>2</sub> was calcined in air at 823 K for 3 h. Then, we physically mixed 3wt%Pt/CeO<sub>2</sub> and 16wt%Ba(NO<sub>3</sub>)<sub>2</sub>/CeO<sub>2</sub>. Finally, the physical mixture of 3wt%Pt/CeO<sub>2</sub> and 16wt%Ba(NO<sub>3</sub>)<sub>2</sub>/CeO<sub>2</sub> catalyst was obtained. An image of this catalyst is shown in Figure. S13.

**Tests 1&2:** Lean NO<sub>x</sub> reduction over a physical mixture of 3wt%Pt/CeO<sub>2</sub> and 16wt%Ba(NO<sub>3</sub>)<sub>2</sub>/CeO<sub>2</sub> catalyst with and without the electric field.

Figure S14 shows the measurement flow. The lean NO<sub>x</sub> reduction tests were performed with and without the 6-mA electric field; 0.2 vol % H<sub>2</sub>, 8 vol % O<sub>2</sub>, and 10 vol% H<sub>2</sub>O were supplied. Subsequently, a temperature-programmed desorption was performed. The results are shown in Figure S15 (A), (B). Table S4 shows the production of NO<sub>x</sub> during reduction tests. The amount of NO and NO<sub>2</sub> at the outlet gas during reduction was higher when the electric field was applied than when it was not applied. The reason why the NO comes out in the electric field mainly as NO rather than N<sub>2</sub> is because Pt is further away from the Ba(NO<sub>3</sub>)<sub>2</sub>, and this result is consistent with earlier studies <sup>1)</sup>. These results clearly show that the nitrate decomposition occurs not only in close proximity to the Pt, but also further away from the Pt in the electric field.

**Test 3:** Lean NO<sub>x</sub> reduction without supplying H<sub>2</sub> over a physical mixture of 3wt%Pt/CeO<sub>2</sub> and 16wt%Ba(NO<sub>3</sub>)<sub>2</sub>/CeO<sub>2</sub> catalyst with the electric field.

The purpose of this test is to verify the hydrogen functions as a reductant. Using the physical mixture of 3wt%Pt/CeO<sub>2</sub> and 16wt%Ba(NO<sub>3</sub>)<sub>2</sub>/CeO<sub>2</sub> catalyst, only the electric field was applied without supplying H<sub>2</sub> in the reduction step; 8 vol % O<sub>2</sub>, and 10 vol% H<sub>2</sub>O were supplied. The results are shown

in Figure S15 (C) and Table S4. Even in the absence of H<sub>2</sub>, nitrate decomposition occurred in the electric field. However, this phenomenon is thought to be due to the instantaneous energy input from the application of the electric field. In addition, the amount of NO was less than half that when H<sub>2</sub> was supplied (Fig. S15 (A)). Therefore, hydrogen spillover/migration is promoted by applying the electric field, and hydrogen reaches Ba(NO<sub>3</sub>)<sub>2</sub> which is further away from Pt.

**Test 4:** Lean NO<sub>x</sub> reduction over 16wt%Ba(NO<sub>3</sub>)<sub>2</sub>/CeO<sub>2</sub> catalyst with the electric field.

In order to discuss the role of Pt for hydrogen spillover/migration, lean NO<sub>x</sub> reduction test was performed in the electric field using only 16wt%Ba(NO<sub>3</sub>)<sub>2</sub>/CeO<sub>2</sub> catalyst without Pt. The results are shown in Figure S15 (D) and Table S4. The amount of reduced NO<sub>x</sub> was decreased compared to the physical mixture of 3wt%Pt/CeO<sub>2</sub> and 16wt%Ba(NO<sub>3</sub>)<sub>2</sub>/CeO<sub>2</sub> catalyst,. This result indicates that Pt is essential for hydrogen spillover/migration in the electric field.

The total NO<sub>x</sub> desorption (= the total NO<sub>x</sub> desorption during lean reduction + the total NO<sub>x</sub> desorption during temperature-programmed desorption) were in agreement in all tests, shown in Table S4. In other words, the amount of NO<sub>x</sub> accumulated on the catalyst was the same in all tests.

Table S1. BET surface area and Pt particle size of xwt%Pt–ywt%BaO/CeO<sub>2</sub> (x: y= 3: 16, 0.5: 16, 3: 8, 0,5: 8).

|                                    | S <sub>BET</sub> [m <sup>2</sup> /g] | Pt particle size* <sup>1</sup> [nm] |
|------------------------------------|--------------------------------------|-------------------------------------|
| 3wt%Pt-16wt%BaO/CeO <sub>2</sub>   | 100.7                                | 5.06                                |
| 0.5wt%Pt-16wt%BaO/CeO <sub>2</sub> | 99.7                                 | 4.07                                |
| 3wt%Pt-8wt%BaO/CeO <sub>2</sub>    | 110.7                                | 3.00                                |
| 0.5wt%Pt-8wt%BaO/CeO <sub>2</sub>  | 104.5                                | 3.38                                |

\*1: estimated by CO pulse chemisorption

Table S2. NO<sub>x</sub> storage capacity for xwt%Pt–ywt%BaO/CeO<sub>2</sub> (x: y= 3: 16, 0.5: 16, 3: 8, 0.5: 8).

|                                    | NO <sub>x</sub> storage [mmol NO <sub>x</sub> /g <sub>cat</sub> ] | Storage efficiency <sup>*2</sup> [%] |
|------------------------------------|-------------------------------------------------------------------|--------------------------------------|
| 3wt%Pt-16wt%BaO/CeO <sub>2</sub>   | 0.727                                                             | 52.1                                 |
| 0.5wt%Pt-16wt%BaO/CeO <sub>2</sub> | 0.446                                                             | 32.0                                 |
| 3wt%Pt-8wt%BaO/CeO <sub>2</sub>    | 0.550                                                             | 39.4                                 |
| 0.5wt%Pt-8wt%BaO/CeO <sub>2</sub>  | 0.464                                                             | 33.2                                 |

\*2: (NO<sub>x</sub> storage/NO supplied to catalyst in 60min) × 100

Table S3. Relationship between the NO<sub>x</sub> stored and the released nitrogen-containing species.

|            | Nitrogen balance / % <sup>3)</sup> |
|------------|------------------------------------|
| With EF    | 100.97                             |
| Without EF | 101.84                             |

\*3: Balance =  $\frac{\text{the released nitrogen-containing species}}{\text{the accumulated NO}_x} \times 100$

In order to quantify the amount of accumulated NO<sub>x</sub> remaining on the catalyst after the NO<sub>x</sub> reduction measurement, a temperature-programmed desorption was performed, heating every catalyst up to 973 K in inert atmosphere. The nitrogen-balance calculated based on the accumulated NO<sub>x</sub> (during NO<sub>x</sub> storage) and the released nitrogen-containing species (the reduction and desorption step) is almost 100% shown in Table S3, suggesting that no byproducts such as N<sub>2</sub>O and NH<sub>3</sub> other than N<sub>2</sub>, NO and NO<sub>2</sub> are formed.

Table S4. Production of NO<sub>x</sub> during reduction tests and NO<sub>x</sub> storage in Figure S15.

|                                                                | NO [mmol/g] | NO <sub>2</sub> [mmol/g] | N <sub>2</sub> [mmol/g] | NO <sub>x</sub> storage [mmol/g] |
|----------------------------------------------------------------|-------------|--------------------------|-------------------------|----------------------------------|
| A. With EF                                                     | 0.082       | 0.010                    | 0.000                   | 0.8954                           |
| B. Without EF                                                  | 0.002       | 0.000                    | 0.000                   | 0.9068                           |
| C. No H <sub>2</sub> With EF                                   | 0.033       | 0.003                    | 0.000                   | 0.8956                           |
| D. Ba(NO <sub>3</sub> ) <sub>2</sub> /CeO <sub>2</sub> With EF | 0.046       | 0.005                    | 0.000                   | 0.8802                           |

The unit [mmol/g] means the amount of NO<sub>x</sub> attached per amount of Ba(NO<sub>3</sub>)<sub>2</sub> in the preparation.

[Reference]

1. J. Coronado and J. Anderson, *J. Mol. Catal. A: Chem.*, 1999, **138**, 83-96.
